# Supplementary material
Source: PubMed Central journal article supplement (PMC4159352)
Supplement: NIHMS56076-supplement-1.pdf [file NIHMS56076-supplement-1.pdf]

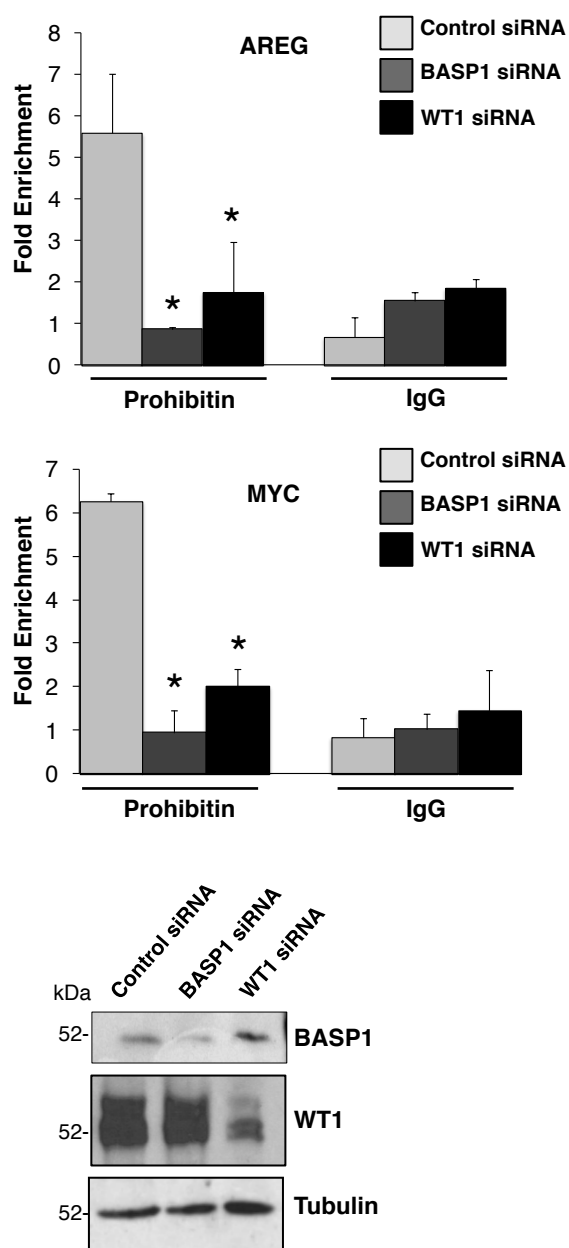

**Figure S1. Prohibitin recruitment to promoters is WT1- and BASP1-dependent.** MCF7 cells were transfected with control siRNA, BASP1 siRNA or WT1 siRNA and 48 hr later were subjected to ChIP assay with anti-prohibitin or control IgG antibodies. Primers to the AREG and c-myc promoters were used in quantitative PCR (qPCR) to obtain fold enrichment relative to a control genome sequence. Error bars represent standard deviation from the mean (SDM) of three independent experiments and \* $p < 0.05$  by Student's t test. As shown below, whole cell extracts were prepared in parallel and immunoblotted with the indicated antibodies.

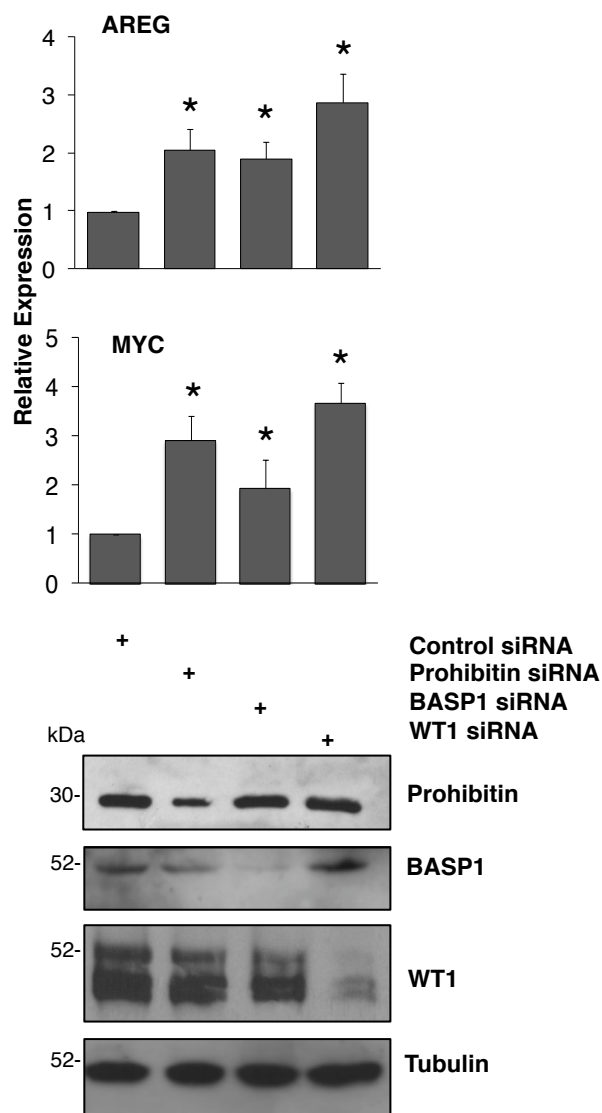

**Figure S2. Prohibitin is required for BASP1 corepressor function.** MCF7 cells were transfected with control siRNA, prohibitin siRNA, BASP1 siRNA or WT1 siRNA. After 48hr, RNA and whole cell extracts were prepared in parallel. qPCR was performed to quantify the expression of AREG and c-myc relative to GAPDH mRNA. The whole cell extracts were blotted with the antibodies indicated.

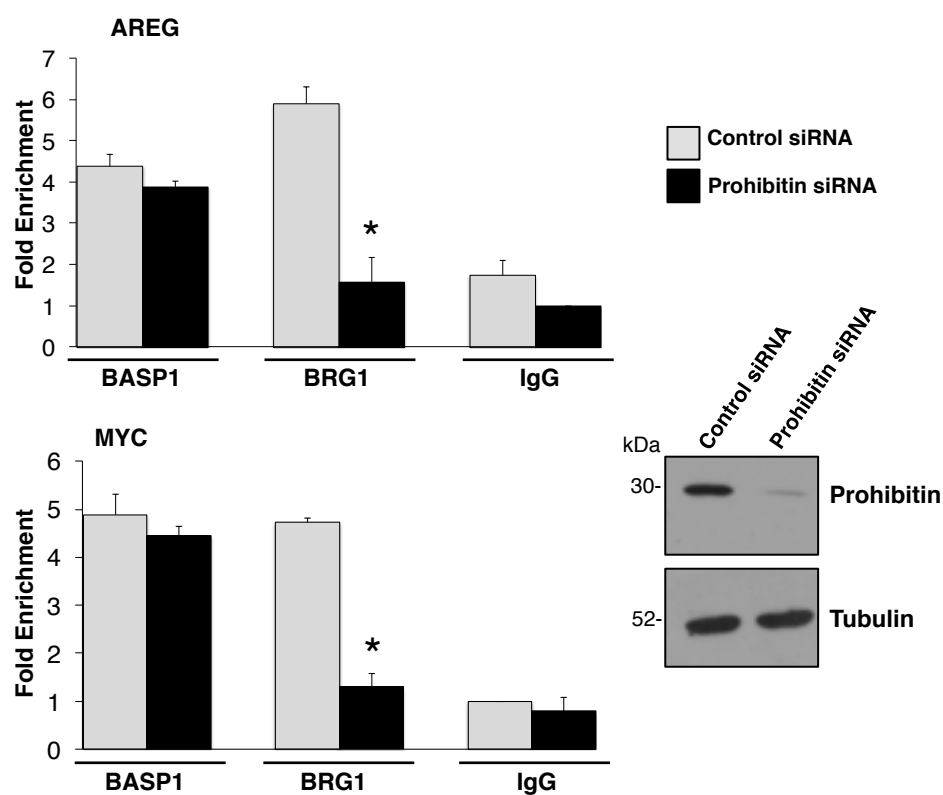

**Figure S3. BRG1 recruitment to promoters is prohibitin-dependent.** MCF7 cells were transfected with control siRNA or prohibitin siRNA. After 48hr, the cells were subjected to ChIP assays with control IgG antibodies, BASP1 antibodies and BRG1 antibodies. The results are presented as fold enrichment of AREG and c-myc amplification relative to a control noncoding gene. The error bars represent the SDM of three independent experiments; \* $p < 0.05$  by Student's t test. Immunoblotting of whole cell extracts were performed with the antibodies indicated.
